# Supplementary material
Source: HighWire-hosted journal article supplement (https://bmjopenquality.bmj.com/highwire/filestream/136247/field_highwire_adjunct_files/0/ds6210.pdf)
Supplement: ds6210.pdf [file ds6210.pdf]

InfoFlex v5 Data Entry - Trauma and Orthopaedics

InfoFlex Module View Subject Event Summary Help

Hospital Number CR0020 20021974 Forename CR0060 TESTING Surname CR0050 TESTING Birth Date CR0100 01/01/1952 Sex CR0090 F - Female NHS Number CR0010

Data Entry --- Upper Limb Surgery (Surgery Date & Time = '22/06/2015 12:06:06')  
 Last changed by 'gail.malek' on 22/06/2015 at 12:07:27

Hospital Number CR0020 | 20021974

Screens | Grid

Surgery (Upper Limb) Details

**Surgeon and Anaesthetist**

Surgery Date & Time: 22/06/2015 12:06:06 Consultant: [Dropdown]  
 Operating Surgeon: [Dropdown] Anaesthetist: [Dropdown]  
 Assistant Surgeon: [Dropdown] Anaesthetist Other: [Dropdown]

**Procedure Details**

Surgery Template: 3 - Shoulder Arthroscopy

|                      |         |         |  |  |  |
|----------------------|---------|---------|--|--|--|
| Combined Procedure   | W88.9 - | Z81.5 - |  |  |  |
| Combined Procedure 2 |         |         |  |  |  |
| Combined Procedure 3 |         |         |  |  |  |

Comments: [Text Area]

**Procedures Using Non Combined Codes**  
 (Historic procedure codes recorded prior to Combined procedure codes)

|                  |  |
|------------------|--|
| Procedure Code 1 |  |
| Procedure Code 2 |  |
| Procedure Code 3 |  |
| Procedure Code 4 |  |
| Procedure Code 5 |  |
| Procedure Code 6 |  |

Add Operation Report

**Reference**

|                             |  |
|-----------------------------|--|
| Author Code                 |  |
| Secretary Code              |  |
| Responsible Consultant Code |  |

**Data View**

- Trauma and Orthopaedics
  - Patient Demographic details
    - Miscellaneous Correspondence Patient (r)
    - Miscellaneous Correspondence GP (r)
    - Fracture Liaison Misc Correspondence (GP) (r)
    - Fracture Liaison Service Miso correspondence (Patient) (r)
    - Operation History (r)
  - Referral (r)
    - Miscellaneous Correspondence GP (r)
    - Miscellaneous Correspondence Patient (r)
    - Upper Limb Questionnaire Letter (r)
    - Linked Referral (r)
  - Definitive Diagnosis and Clinical Summary
    - Fracture Liaison
      - DNA Letter(GP) (r)
      - Over 75 Letter (GP) (r)

**Subject Overview**

- Ward Round (21/04/2015 11:40:10)
- Upper Limb Surgery (11/06/2015)
- Upper Limb Surgery (18/06/2015 10:45:58)
- Referral (28/04/15 :: U :: RTG00000000000263664 :: ...)
- Linked Referral (28-04-15 :: U :: 2015E0091660 :: ...)
- Definitive Diagnosis and Clinical Summary
- IP (28/04/2015)
  - IP Transfers (28/04/2015 :: CT1)
  - IP Transfers (29/04/2015 :: CT2)
- Upper Limb Surgery (22/05/2015)
- Operation Report (11/06/2015 10:59:51)
- Upper Limb Surgery (28/05/2015)
- Upper Limb Surgery (10/06/2015)
- Upper Limb Surgery (16/06/2015)
- Operation Report (16/06/2015 13:30:25)
- Upper Limb Surgery (17/06/2015)
- Upper Limb Surgery (17/06/2015 10:20:24)
- Upper Limb Surgery (17/06/2015 11:09:33)
- Upper Limb Surgery (17/06/2015 11:34:39)
- Upper Limb Surgery (17/06/2015 11:36:01)
- Upper Limb Surgery (19/06/2015 12:12:11)
- Operation Report (19/06/2015 12:15:30)
- Upper Limb Surgery (19/06/2015 12:42:54)
- Operation Report (19/06/2015 12:46:09)
- Upper Limb Surgery (22/06/2015 12:06:06)
- Referral (30/06/15 :: U :: RTG00000000000301255 :: ...)
- Linked Referral (30-06-15 :: U :: 2015E0142863 :: ...)
- Definitive Diagnosis and Clinical Summary
- Referral (30/06/15 :: R :: RTG00000000000301258 :: ...)
- Linked Referral (30-06-15 :: R :: 2015E0142866 :: ...)
- Definitive Diagnosis and Clinical Summary
- Operation History (30/03/2015 09:36:10 :: DIC :: 1 :: U)
- Operation History (30/03/2015 09:37:58 :: DIC :: 2 :: U)

13:01 22/09/2015

InfoFlex v5 Data Entry - Trauma and Orthopaedics

InfoFlex Module View Subject Event Summary Help

Hospital Number CR0020 20021974 Forename CR0060 TESTING Surname CR0050 TESTING Birth Date CR0100 01/01/1952 Sex CR0090 F - Female NHS Number CR0010

Data Entry --- Upper Limb Surgery (Surgery Date & Time = '22/06/2015 12:06:06')  
 Last changed by 'gail.malek' on 22/06/2015 at 12:07:27

Hospital Number CR0020 20021974 Find Save

Screens Grid

Shoulder Arthroscopy

Shoulder Arthroscopy (B)

Shoulder Arthroscopy Details

Operation Title

Antibiotics Anaesthesia Local Anaesthetic

Operating Position Shoulder Side Portals

Closure Dressings Sling

Preparation ASA Grade DVT Prophylaxis

Arthroscopic Findings

EUA

Rotator Cuff Tear Rotator Cuff Tear Size

Subscapularis Tear Biceps

SLAP Labral Tear

Frozen Shoulder Labral Tear Location

Calcific tendonitis Glenoid Cartilage

Subacromial Space

Humeral Cartilage

ACJ

Other

Additional Findings

Procedure

Procedure

Post Operative Instructions

Sling Duration Clinic Follow Up

Physiotherapy Wound Check

Other Instructions

Surgery Details

Patient Demographic details  
 Miscellaneous Correspondence Patient (r)  
 Miscellaneous Correspondence GP (r)  
 Fracture Liaison Misc Correspondence (GP) (r)  
 Fracture Liaison Service Misc correspondence (Patient)  
 Operation History (r)  
 Referral (r)  
 Miscellaneous Correspondence GP (r)  
 Miscellaneous Correspondence Patient (r)  
 Upper Limb Questionnaire Letter (r)  
 Linked Referral (r)  
 Definitive Diagnosis and Clinical Summary  
 Fracture Liaison  
 DNA Letter(GP) (r)  
 Over 75 Letter (GP) (r)

Subject Overview

- Ward Round (21/04/2015 11:40:10)
- Upper Limb Surgery (11/06/2015)
- Upper Limb Surgery (18/06/2015 10:45:58)
- Referral (28/04/15 :: U :: RTG00000000000263664 ::
- Linked Referral (28-04-15 :: U :: 2015E0091660 ::
- Definitive Diagnosis and Clinical Summary
- IP (28/04/2015)
- IP Transfers (28/04/2015 :: CT1)
- IP Transfers (29/04/2015 :: CT2)
- Upper Limb Surgery (22/05/2015)
- Operation Report (11/06/2015 10:59:51)
- Upper Limb Surgery (28/05/2015)
- Upper Limb Surgery (10/06/2015)
- Upper Limb Surgery (16/06/2015)
- Operation Report (16/06/2015 13:30:25)
- Upper Limb Surgery (17/06/2015)
- Upper Limb Surgery (17/06/2015 10:20:24)
- Upper Limb Surgery (17/06/2015 11:09:33)
- Upper Limb Surgery (17/06/2015 11:34:39)
- Upper Limb Surgery (17/06/2015 11:36:01)
- Upper Limb Surgery (19/06/2015 12:12:11)
- Operation Report (19/06/2015 12:15:30)
- Upper Limb Surgery (19/06/2015 12:42:54)
- Operation Report (19/06/2015 12:46:09)
- Upper Limb Surgery (22/06/2015 12:06:06)
- Referral (30/06/15 :: U :: RTG00000000000301255 ::
- Linked Referral (30-06-15 :: U :: 2015E0142863 ::
- Definitive Diagnosis and Clinical Summary
- Referral (30/06/15 :: R :: RTG00000000000301258 ::
- Linked Referral (30-06-15 :: R :: 2015E0142866 ::
- Definitive Diagnosis and Clinical Summary
- Operation History (30/03/2015 09:36:10 :: DIC :: 1 :: U
- Operation History (30/03/2015 09:37:58 :: DIC :: 2 :: U

13:00  
22/09/2015
